# Supplementary material for: Kinetics and mechanism of the Co(ii)-assisted oxidation of thioureas by dioxygen
Source: Royal Society of Chemistry journal article supplement (doi:10.1039/b417775d), 2005-01-01
Supplement: b417775d.pdf [file b417775d.pdf]

## Kinetics and mechanism of the Co(II)-assisted oxidation of thioureas by dioxygen

Evgeny V. Kudrik, Alexander Theodoridis, Rudi van Eldik and Sergei V. Makarov

### Supporting Information

#### Legends for Figures

**Figure S1.** Plot of  $\ln k_{\text{obs1}}$  vs. pressure. Experimental conditions: 0.1 M TRIS buffer, pH = 7.0, 25.0 °C,  $[\text{Co}^{\text{II}}\{\text{PyzPz}(\text{PhSO}_3)_8\}(\text{H}_2\text{O})_2]^{8-} = 1.46 \times 10^{-5}$  M,  $[\text{DMTU}] = 0.2$  M

**Figure S2.** Eyring plot for the reaction of **3'** with  $\text{O}_2$ . Experimental conditions: 0.1 M TRIS buffer, pH = 7.0,  $[\text{Co}^{\text{II}}\{\text{PyzPz}(\text{PhSO}_3)_8\}(\text{H}_2\text{O})_2]^{8-} = 2.1 \times 10^{-6}$  M.

**Figure S3.** Eyring plot for reaction of **2** with  $\text{OH}^-$ . Experimental conditions: KOH, pH = 13, 25.0 °C,  $[\text{Co}^{\text{II}}\{\text{PyzPz}(\text{PhSO}_3)_8\}(\text{H}_2\text{O})_2]^{8-} = 1.46 \times 10^{-5}$  M.

**Figure S4.** Plot of  $\ln k_{\text{obs3}}$  vs. pressure. Experimental conditions: 0.1 M TRIS buffer, pH 7.0,  $[\text{Co}^{\text{II}}\{\text{PyzPz}(\text{PhSO}_3)_8\}(\text{H}_2\text{O})_2]^{8-} = 1.46 \times 10^{-5}$  M, 25.0 °C.

**Figure S5.** pH titration curve for  $[\text{Co}^{\text{II}}\{\text{PyzPz}(\text{PhSO}_3)_8\}(\text{H}_2\text{O})_2]^{8-}$  ( $1.46 \times 10^{-5}$  M), 25.0 °C.

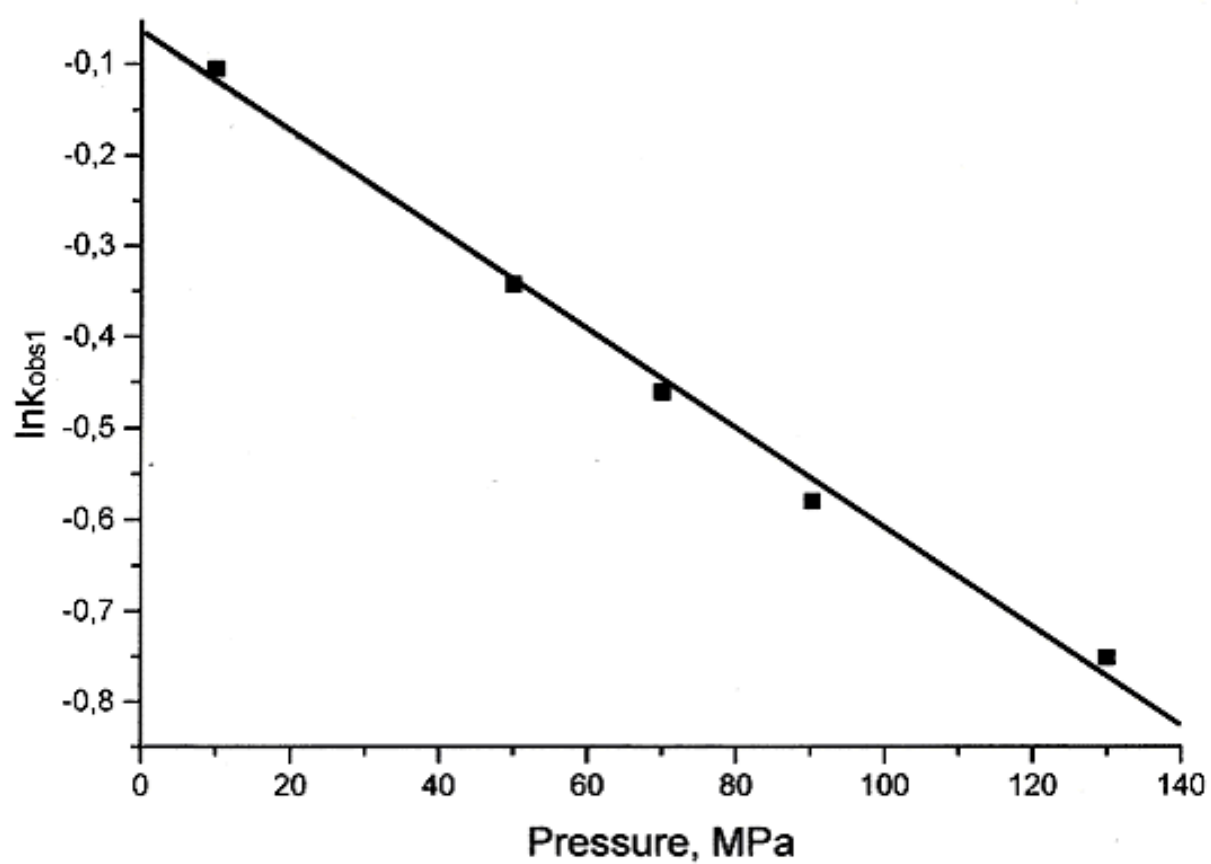

Figure S1

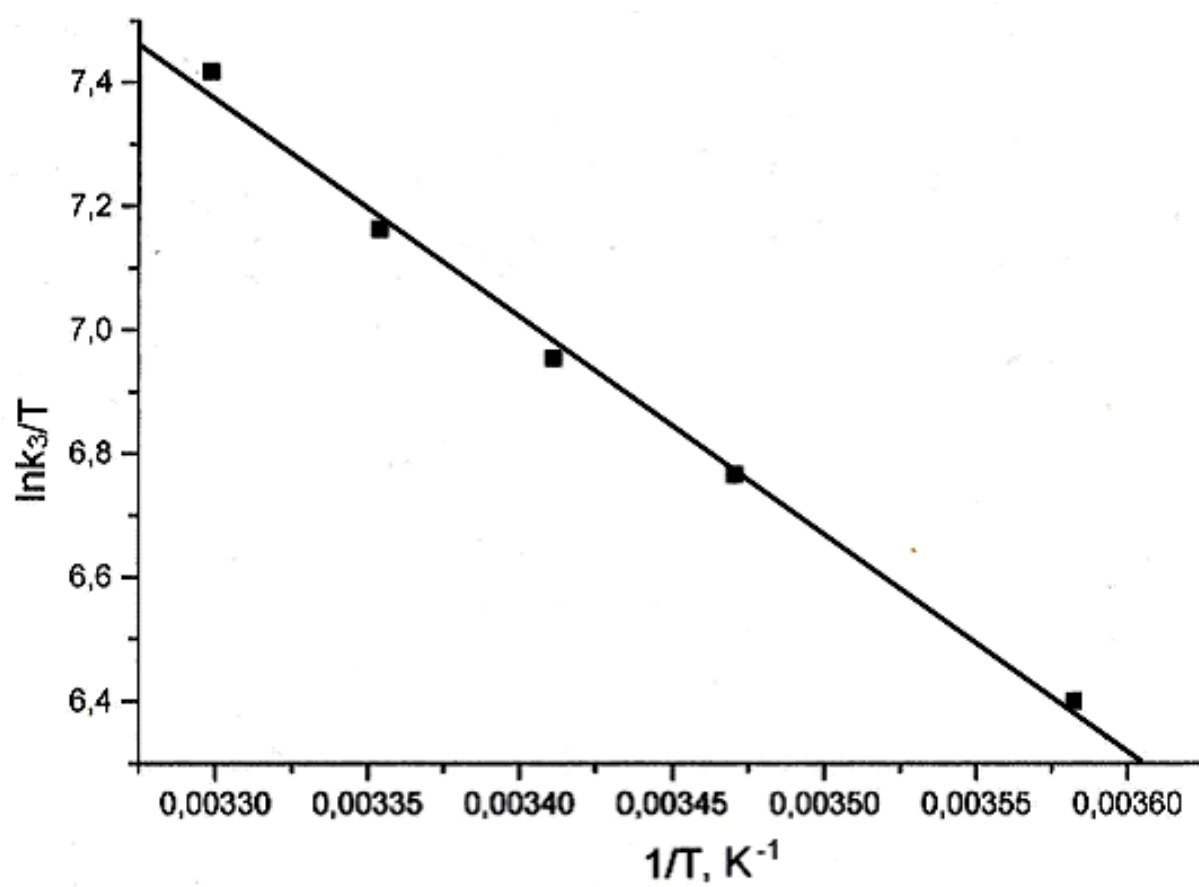

Figure S2

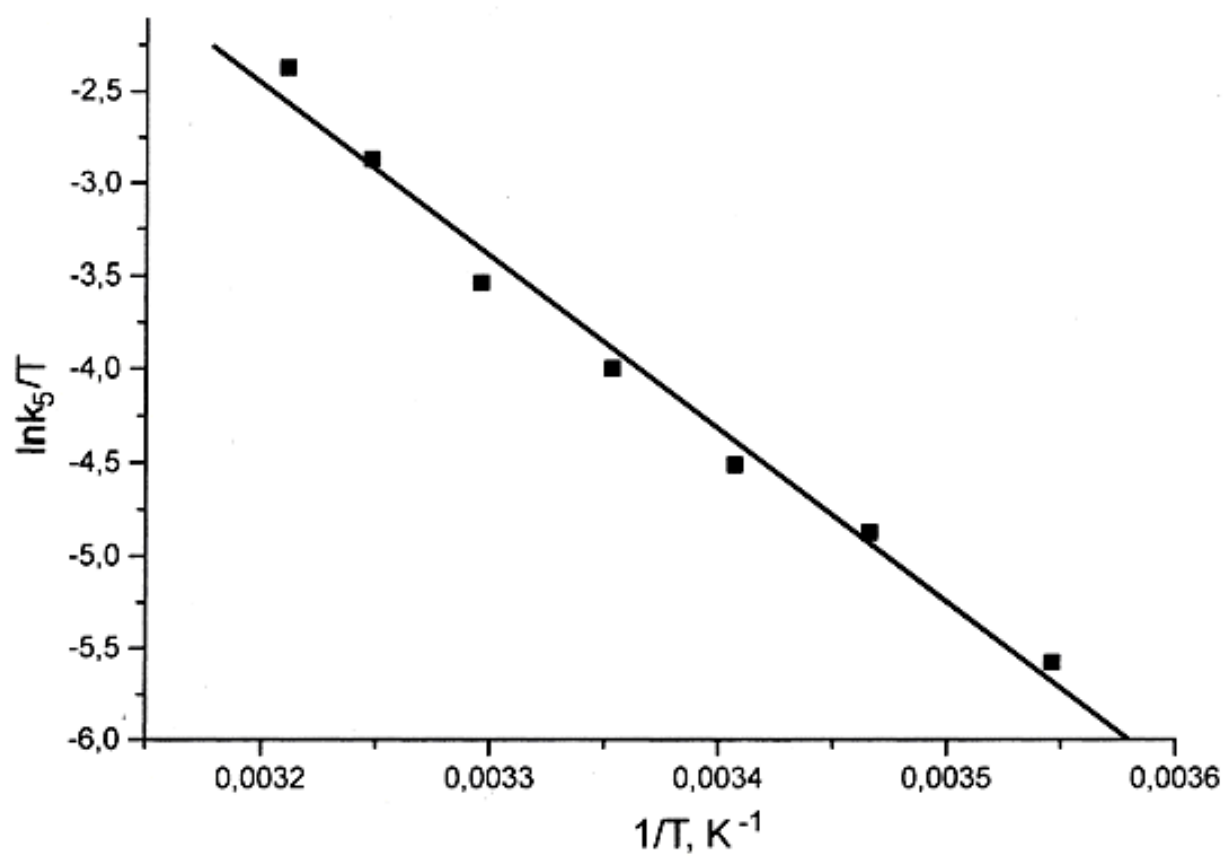

Figure S3

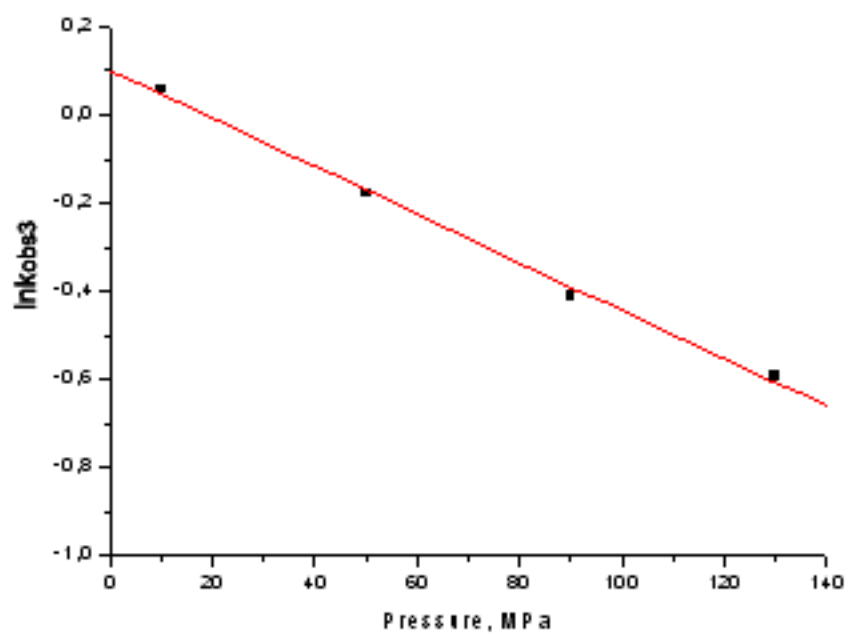

Figure. S4

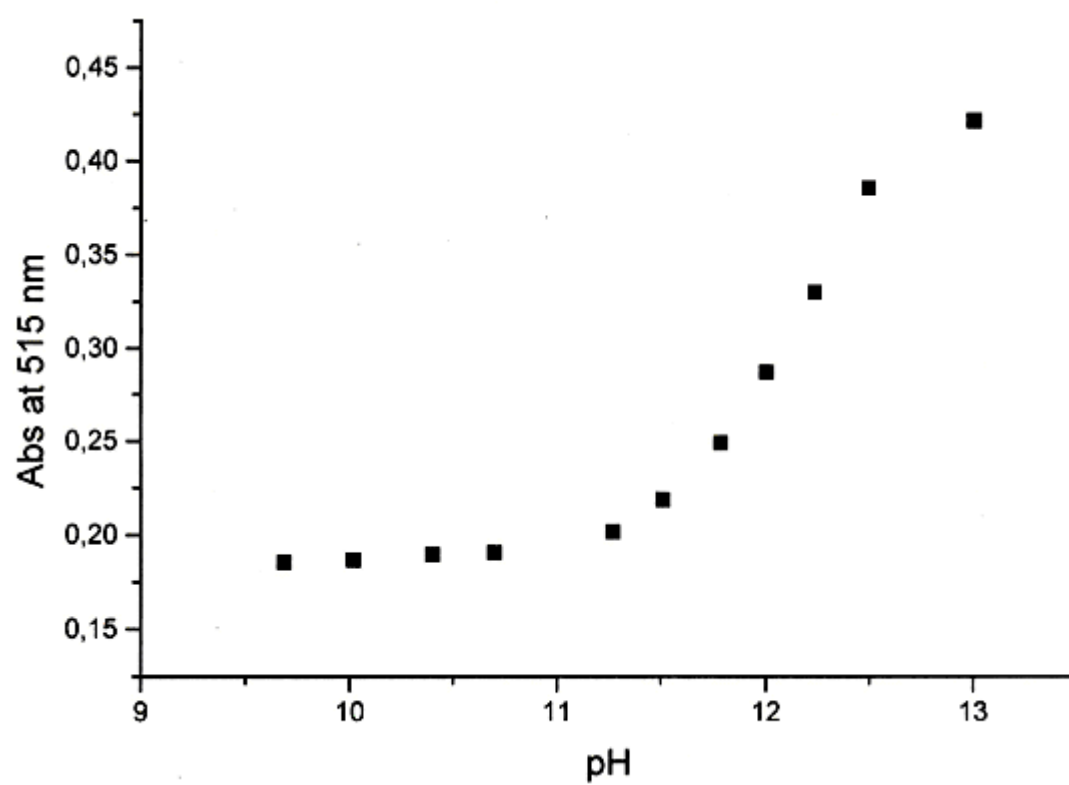

Figure S5
